# Supplementary material
Source: MDPI journal article supplement (https://www.mdpi.com/1424-8247/16/12/1725)
Supplement: s1 [file s1]

Table 1: Primers

|                 |          |                                 |
|-----------------|----------|---------------------------------|
| <b>NLRP3</b>    | <b>F</b> | <b>AGGTGTTGGAATTAGACAAC</b>     |
|                 | <b>R</b> | <b>AATACATTTTCAGACAACCCC</b>    |
| <b>beclin-1</b> | <b>F</b> | <b>ATCTCGAGAAGGTCCAGGCT</b>     |
|                 | <b>R</b> | <b>CTGTCCACTGTGCCAGATGT</b>     |
| <b>LC3</b>      | <b>F</b> | <b>CAGCATCCAACCAAAATCCC</b>     |
|                 | <b>R</b> | <b>GTTGACATGGTCAGGTACAAG</b>    |
| <b>p62</b>      | <b>F</b> | <b>CCAGAGAGTTCCAGCACAGA</b>     |
|                 | <b>R</b> | <b>CCGACTCCATCTG TTCCTCA</b>    |
| <b>lamp2A</b>   | <b>F</b> | <b>GCAGTGCAGATGAAGACAAC</b>     |
|                 | <b>R</b> | <b>AGTATGATGGCGCTTGAGAC</b>     |
| <b>hsc70</b>    | <b>F</b> | <b>CAGGTTTATGAAGGCGAGCGTGCC</b> |
|                 | <b>R</b> | <b>GGGTGCAGGAGGTATGCCTGTGA</b>  |
| <b>β-actin</b>  | <b>F</b> | <b>TGTGGCATCCACGAAACTAC</b>     |
|                 | <b>R</b> | <b>GGAGCAATGATCTTGATCTTCA</b>   |
